# Supplementary material for: Patterns of oribatid mite species diversity: testing the effects of elevation, area and sampling effort
Source: Springer Nature journal article supplement (doi:10.1007/s10493-017-0153-7), 2017-07-01
Supplement: MOESM1 [file 10493_2017_153_MOESM1_ESM.pdf]

Patterns of oribatid mite species diversity: testing the effects of elevation, area and sampling effort

Mumladze Levan\*, Murvanidze Maka, Maraun Mark

\*Biodiversity Research Center (Institute of Ecology) and Institute of Zoology of Ilia State University, Cholokashvili Ave 3/5, 0165 Tbilisi, Georgia; *Invertebrate Research Centre (IRC), Agladze St. 26, 0119 Tbilisi, Georgia.* e-mail: [lmumladze@gmail.com](mailto:lmumladze@gmail.com).  
Experimental and Applied Acarology

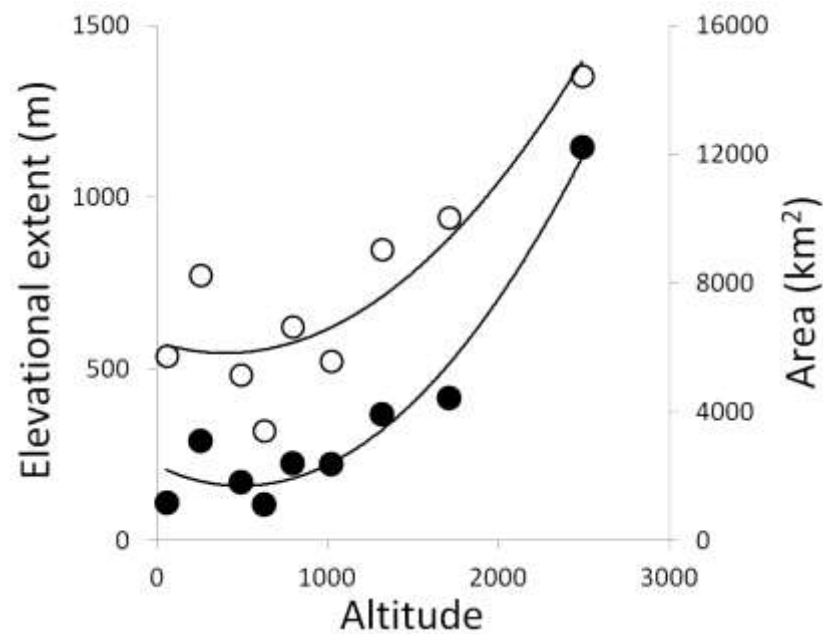

Supplement Figure S1. Pattern of variation of elevational extent (filled circles, second order polynomial regression,  $r^2=0.95$ ) and area (open circles, second order polynomial regression,  $r^2=0.81$ ) of equal sampling (elevational) bands with increasing elevation.

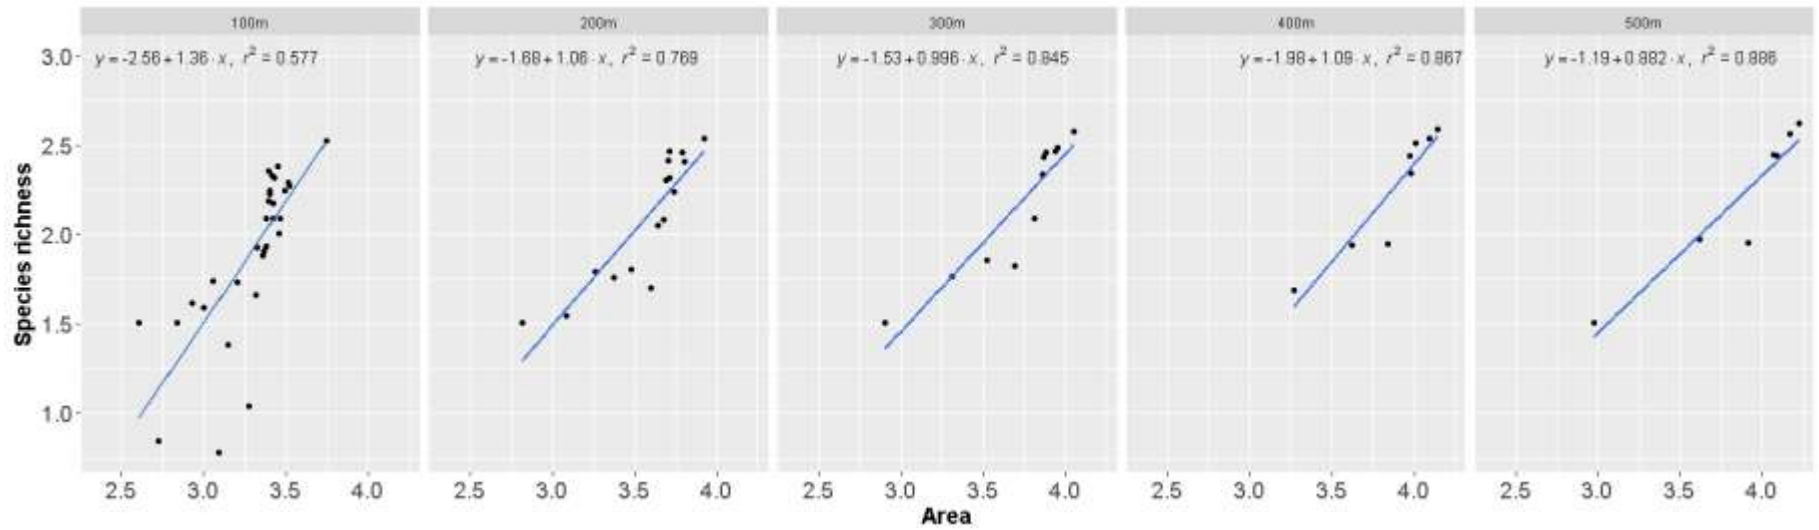

Supplement Figure S2. Species richness vs. area (elevational SAR) for equal elevation bands of different grain sizes. Graphs were constructed after the fitting power function on log-log space.
